# Supplementary material for: Safety, Tolerability, and Efficacy of Viltolarsen in Boys With Duchenne Muscular Dystrophy Amenable to Exon 53 Skipping: A Phase 2 Randomized Clinical Trial
Source: PubMed Central journal article supplement — JAMA Neurol. 2020 May 26;77(8):1–10. doi: 10.1001/jamaneurol.2020.1264 (PMC7251505; doi:10.1001/jamaneurol.2020.1264), 2020-05-26
Supplement: jamaneurol-77-982-s003.pdf [file jamaneurol-77-982-s003.pdf]

## **Data Sharing Statement**

Clemens. Safety, Tolerability, and Efficacy of Viltolarsen in Boys With Duchenne Muscular Dystrophy Amenable to Exon 53 Skipping. *JAMA Neurol*. Published May 26, 2020. 10.1001/jamaneurol.2020.1264

### **Data**

**Data available:** No
